# Supplementary material for: Taxonomic revision of black salamanders of the Aneides flavipunctatus complex (Caudata: Plethodontidae)
Source: PeerJ. 2019 Aug 1;7:e7370. doi: 10.7717/peerj.7370 (PMC6679913; doi:10.7717/peerj.7370)
Supplement: Table S1 — All measurements are rounded to the nearest tenth of a millimeter. [file peerj-07-7370-s001.xlsx]

## Sheet: Sheet1
MVZ #	Sex	Species	Snout-Vent Length	Ax-Gr	Head Width	Forelimb	Hindlimb	RA Hand	RA Foot	Longest Toe	Min Dist Btwn Eyes	Internarial Dist	Sn gl
54484	F	A. niger	72.2	41.3	10.9	14	16.5	5.1	7	3.3	5.7	2.8	17.2
35505	F	A. niger	73.7	40.4	10.9	14.1	16.7	5.2	7.1	3.4	5.5	2.8	17.2
124508	F	A. niger	72.1	38.5	10.3	14.2	16.2	5.3	6.9	3.5	4.8	2.8	16.3
107268	F	A. niger	68.4	38.6	10.3	14.5	16.8	4.5	6.7	2.9	5.5	3.1	16.2
16423	F	A. niger	68.7	38.4	10.5	13.1	16.2	4.8	6.6	3.7	5.6	2.9	15.4
241869	F	A. niger	61.1	35.8	8.9	13.8	15.8	4.5	6.5	3.5	4.8	2.7	14.3
35516	F	A. niger	71.6	41.5	10.8	13.6	16.3	5.4	7.3	3.9	5.6	3.3	17
54486	F	A. niger	63.5	33.7	9.3	12.1	14.8	4	6.5	3.5	4.5	2.7	14.2
124605	F	A. niger	67.6	38.5	10.1	13.9	15.8	4.4	6.6	2.9	5	2.5	16.5
35509	F	A. niger	58.3	31.7	9.7	12.7	15.8	4.4	6.4	3.6	5.1	3.3	13.6
241877	M	A. niger	85.7	48.3	16.3	18	19.2	6.4	8.6	3.6	7.2	3.7	19.3
35497	M	A. niger	81.6	45.4	14.2	15.9	17.8	5.9	8.2	3.2	5.9	2.9	18.5
35506	M	A. niger	79	43.5	15.1	16.3	19.2	5.8	7.2	3.4	5.5	3.4	19.1
35499	M	A. niger	82.5	45.9	13.5	16.6	19.4	5.9	7.4	3.5	6.1	3.8	19.4
124604	M	A. niger	75.6	39.4	12.5	16.3	18.8	5.4	7.1	3	6.1	3.2	18.3
124513	M	A. niger	73.7	37.5	12.5	15.4	18.6	5.5	7	3.6	5.7	3.8	17.4
241870	M	A. niger	70.8	38.4	11.1	15.1	16.5	4.9	7	2.8	5.1	2.9	16.3
124640	M	A. niger	70.1	37.3	11.5	13.7	16.4	5.1	6.2	2.8	4.8	3.3	16.3
35495	M	A. niger	68.8	38	10.5	13.5	15.2	4.4	6.1	2.4	5.1	3.3	16.2
241889	M	A. niger	71.2	38.7	12.1	14.7	17.2	5.2	6.6	3.1	5.6	3.4	15.4
219970	F	A. flavipunctatus	78.1	45.5	11.8	15.4	18.2	5.5	7.5	4.1	5.4	2.8	17.6
241635	F	A. flavipunctatus	72.6	41.2	11.8	15.3	17.5	5.5	8	3.7	5	2.9	15.4
241642	F	A. flavipunctatus	72.9	41.2	11	14.6	18	5.5	7	3.7	4.9	2.8	16.6
203528	F	A. flavipunctatus	71	39.8	9.8	14.6	16.6	4.9	6.9	4	4.6	2.5	15.6
241636	F	A. flavipunctatus	74	42.5	11.7	14.4	16.4	6	6.9	4.5	5.4	2.8	17.4
203543	F	A. flavipunctatus	67.2	34.7	8.9	13.4	16	5.2	7.2	3.6	4.5	2.4	14.3
203545	F	A. flavipunctatus	68.7	35.1	9.7	13.6	16.6	4.6	6.9	3.3	4.8	2.5	14.8
123538	F	A. flavipunctatus	67.6	36.3	10.1	14.4	16.4	5.2	7	3.2	4.4	2.5	16.4
196361	F	A. flavipunctatus	71.6	37.6	10.2	14.5	16.4	4.7	6.7	3.6	4.5	2.6	16.3
224315	F	A. flavipunctatus	69.6	38	10	13.9	16.5	5.1	6.2	3.2	4.6	2.8	17.5
123421	F	A. flavipunctatus	69.3	36.6	11.1	14.5	16.7	5	7.8	3.4	5.1	2.9	15.5
226776	M	A. flavipunctatus	80.3	44.5	15.2	16.8	18.8	6.1	8.3	3.7	5.6	3.1	17.9
241644	M	A. flavipunctatus	79.2	41.8	11.5	15.5	18.1	4.6	7.4	4.5	5.3	3.5	18.5
123553	M	A. flavipunctatus	76.9	43.5	13	16.5	18.8	5.6	8.4	4.5	5.4	3.1	17.6
203540	M	A. flavipunctatus	73.1	38.3	10.8	16	17.7	5.4	7.4	3.5	5	2.8	16.7
203541	M	A. flavipunctatus	70.9	37.2	10.9	14.3	15.9	5.3	7	3.4	5.3	2.8	16.8
241647	M	A. flavipunctatus	68.1	37.1	11.4	13.5	16	5	7.2	3.1	5	2.8	16
196360	M	A. flavipunctatus	74.9	41.7	12.6	14.7	17.9	5.1	7.8	3	5.1	2.8	18.5
193024	M	A. flavipunctatus	70	38	12.2	15.2	17.3	5.6	7.9	3.6	5.2	2.6	17.1
203539	M	A. flavipunctatus	70.6	37.1	11	15.6	16.5	5.8	7.7	3.1	5.1	2.5	17.1
203546	M	A. flavipunctatus	64.4	31.3	10.4	15.3	17.5	5.9	7.4	3.9	5.3	3	16
124236	F	A. klamathensis	84.8	47.7	11.7	16.8	18.7	6.6	8.7	4.2	5.5	3.4	18.4
217468	F	A. klamathensis	74.7	42.4	11.1	16.5	18.5	5.9	8.7	4	5.3	3.2	17.2
124223	F	A. klamathensis	72.9	43.8	10.5	16	17.5	5.3	-	3.7	5.2	3.1	16.5
124221	F	A. klamathensis	70.1	39.1	10.2	15.7	17.4	4.5	7.2	3.3	4.7	3.1	15.7
124225	F	A. klamathensis	67.2	39	9.9	15.3	16.7	4.3	5.6	3.2	4.9	3.2	15.5
124230	F	A. klamathensis	70.7	37.1	10.4	15.5	17.6	5.5	7.2	3.5	5.3	2.9	16.8
124220	F	A. klamathensis	69.8	37.9	11.1	15.2	18	5.9	7.7	3.2	4.6	2.8	16.7
217471	F	A. klamathensis	71	39.6	10.4	14.9	17.5	5	6.8	3.7	5.3	3.3	16
217462	F	A. klamathensis	65.4	36.5	10.1	15	16.2	5	6.4	2.9	4.6	2.8	15.3
124237	F	A. klamathensis	70.4	39.7	9.5	14.1	16.9	5.1	6.1	4.1	4.5	3	15.4
217469	M	A. klamathensis	75.2	40.4	13.3	16	17.9	6.2	9	3	6.1	3.2	18.5
124011	M	A. klamathensis	72.6	39.2	12.2	15.6	18.7	5.8	6.8	3.6	5.6	3.4	18.7
124238	M	A. klamathensis	76.7	39.8	12.4	16.2	18.3	5.5	7.4	3.3	5.9	3.3	18.4
221018	M	A. klamathensis	75.4	42.1	13.9	16	18.3	5.9	8.1	3.5	4.7	2.6	17.5
124229	M	A. klamathensis	80.6	42.6	12.7	17.3	19.5	5.6	8.2	3.5	5.9	3.5	19
196262	M	A. klamathensis	74	39.7	12.8	17	19.1	5.5	8	2.9	5.6	3.2	18.4
124006	M	A. klamathensis	69.7	36	12.4	14.7	17.6	6	7.1	3.6	5.6	3.3	17.6
124222	M	A. klamathensis	75.9	41	13.3	17.1	19.3	6.3	9.4	3.4	5.8	3.5	18.3
196349	M	A. klamathensis	74.8	40.4	11.6	16.7	19.9	6	8.1	3.2	5.8	3.4	19.4
124234	M	A. klamathensis	68.2	36.6	10.5	15.5	17.7	5.2	7.9	2.9	5.7	3.4	16.5
203560	F	A. iecanus	77.4	43.2	10.5	15.2	17.2	5.9	8.1	3.8	5.2	2.9	17.7
203564	F	A. iecanus	78.7	45.9	10.8	14.9	18.1	5.8	7	3.6	5.1	3	17.4
124341	F	A. iecanus	70.8	40.3	10.7	14.9	16.5	5.2	6.2	3.5	5	3.2	15.6
124331	F	A. iecanus	73.4	43.1	10.5	14.4	17.1	4.3	6.4	3	5.1	2.7	16.8
57032	F	A. iecanus	60.9	35.4	8.8	12.1	14.9	4.6	6.6	2.9	4.7	2.7	14.6
170964	F	A. iecanus	68.9	39	9.8	14.1	16.1	4.5	6.9	3.2	4.9	3	15.9
124328	F	A. iecanus	67.8	39.7	10.2	14	16.9	4.4	6.4	2.9	4.6	2.4	15.4
57007	F	A. iecanus	64	35	10	13.4	16.4	5.5	7	2.8	5.1	2.7	15.7
91368	F	A. iecanus	71.3	37.3	9.4	13.5	15.8	5	7.1	2.8	4.8	2.9	15.9
124330	F	A. iecanus	68.1	36.6	9.4	13.1	16.9	4.9	6.3	3.2	4.7	2.8	16
147584	M	A. iecanus	73.5	39.7	12	16.2	18.9	6	7.9	2.8	5.2	3.4	17.6
203561	M	A. iecanus	75.6	42.5	12.9	14.8	17.5	6.1	8.2	2.9	5.9	3.6	18.1
196384	M	A. iecanus	81.6	42	12.7	16.2	19.7	6.2	8.6	3.7	5.8	4.2	20.3
203566	M	A. iecanus	80.3	45.5	12.8	16.8	19.9	5.9	8.6	3	6.3	3.5	19.2
124307	M	A. iecanus	78.6	44.7	12.1	15.7	19	6.1	8.4	3.1	5.5	3.1	19.9
221019	M	A. iecanus	69.9	38.3	11	15.6	19.5	5.5	7.7	3	4.9	3	16
163700	M	A. iecanus	74.9	41.1	12.5	14.8	17.7	5.6	6.8	3.3	5.7	3.5	17.4
196385	M	A. iecanus	78.8	43	13.3	17.4	21.4	6	8.3	3.1	6.1	3.2	18.3
147585	M	A. iecanus	73.9	39.5	12.9	15.4	17.3	5.6	7.7	2.9	5.7	3.1	17.5
124306	M	A. iecanus	71.1	38.2	12.3	14.2	17.8	5.1	6.4	2.7	5.2	3	16.4
